# Supplementary material for: Development and Validation of a 7-Year Risk Prediction Model for Progression from Subjective Cognitive Decline to Mild Cognitive Impairment: A Prospective Cohort Study Using CHARLS Data
Source: Research Square preprint supplement (doi:10.21203/rs.3.rs-8710849/v1), 2026-02-17
Supplement: Supplementary file 2 [file 94a267c725c3d976bd92e80a.docx]

**TableS1** Multicollinearity assessment

| Feature | VIF |
| --- | --- |
| Living with children | 1.01 |
| Visual acuity | 1.03 |
| Arthritis | 1.07 |
| Hobbies | 1.08 |
| Gender | 1.10 |
| Pension insurance | 1.13 |
| CESD-10 | 1.16 |
| Place of residence | 1.17 |
| Cognitive total score | 1.24 |
| Tab Educational level | 1.29 |

**TableS2** Characteristics and point allocation of predictors in the nomogram for MCI risk prediction

| Variable | Effect | Max Points | OR Value | 95% CI |
| --- | --- | --- | --- | --- |
| Educational level | Protective | 100.0 | 0.524 | 0.46–0.60 |
| Cognitive total score | Protective | 93.7 | 0.546 | 0.48–0.62 |
| Pension insurance | Protective | 28.4 | 0.833 | 0.72–0.96 |
| Gender (Female) | Protective | 22.5 | 0.865 | 0.76–0.99 |
| Arthritis | Protective | 17.7 | 0.892 | 0.78–1.02 |
| Marital status (Married) | Protective | 7.9 | 0.950 | 0.84–1.07 |
| Visual acuity (Poor) | Risk | 14.3 | 1.097 | 0.96–1.25 |
| Place of residence (Urban) | Risk | 13.2 | 1.089 | 0.96–1.24 |
| Living with children | Risk | 12.7 | 1.086 | 0.95–1.24 |

Abbreviations: MCI, mild cognitive impairment; OR, odds ratio; CI, confidence interval.

Variables were coded as follows: Educational level (ordinal, range 0–18 years); Cognitive total score (continuous, range 0–21); Pension insurance (0 = no, 1 = yes); Gender (0 = male, 1 = female); Arthritis (0 = no, 1 = yes); Marital status (0 = unmarried/divorced/widowed, 1 = married); Visual acuity (0 = good/fair, 1 = poor); Place of residence (0 = rural, 1 = urban); Living with children (0 = no, 1 = yes). Points represent the scaled contribution of each variable to the nomogram score, with higher points indicating greater influence on MCI risk.
